# Supplementary material for: Holistic Photoprotection, Broad Spectrum (UVA-UVB), and Biological Effective Protection Factors (BEPFs) from Baccharis antioquensis Hydrolysates Polyphenols
Source: MDPI journal article supplement (doi:10.3390/plants12050979), 2023-02-21
Supplement: s1 [file s1]

# Holistic Photoprotection, Broad Spectrum (UVA-UVB), and Biological Effective Protection Factors (BEPFs) from *Baccharis antioquiensis* Hydrolysates Polyphenols

Yéssica A. Monsalve-Bustamante <sup>1</sup>, Félix López Figueroa <sup>2</sup>, Julia Vega <sup>2</sup>,  
Bruna Rodrigues Moreira <sup>3</sup>, Miguel Puertas-Mejía <sup>1</sup>  
and Juan C. Mejía-Giraldo <sup>1,4,\*</sup>

<sup>1</sup> Grupo de Investigación en Compuestos Funcionales, Facultad de Ciencias Exactas y Naturales, Universidad de Antioquia UdeA, Calle 70 No. 52-21, Medellín 050010, Colombia

<sup>2</sup> Departamento de Ecología y Geología, Instituto Universitario de Biotecnología y Desarrollo Azul (IBYDA), Universidad de Málaga, Campus Universitario de Teatinos s/n, 29071 Málaga, Spain

<sup>3</sup> Phycology Laboratory, Botany Department, Federal University of Santa Catarina, Florianopolis 88049-900, SC, Brazil

<sup>4</sup> Grupo de Estabilidad de Medicamentos, Cosméticos y Alimentos, Facultad de Ciencias Farmacéuticas y Alimentarias, Universidad de Antioquia UdeA, Carrera 50A No 63-85, Medellín 050010, Colombia

\* Correspondence: [juan.mejia8@udea.edu.co](mailto:juan.mejia8@udea.edu.co)

ORCID of the author

Juan C. Mejía-Giraldo 0000-0002-2722-988X

## Supplementary Materials (SM)

**Figure S1. Extractions assay 1**

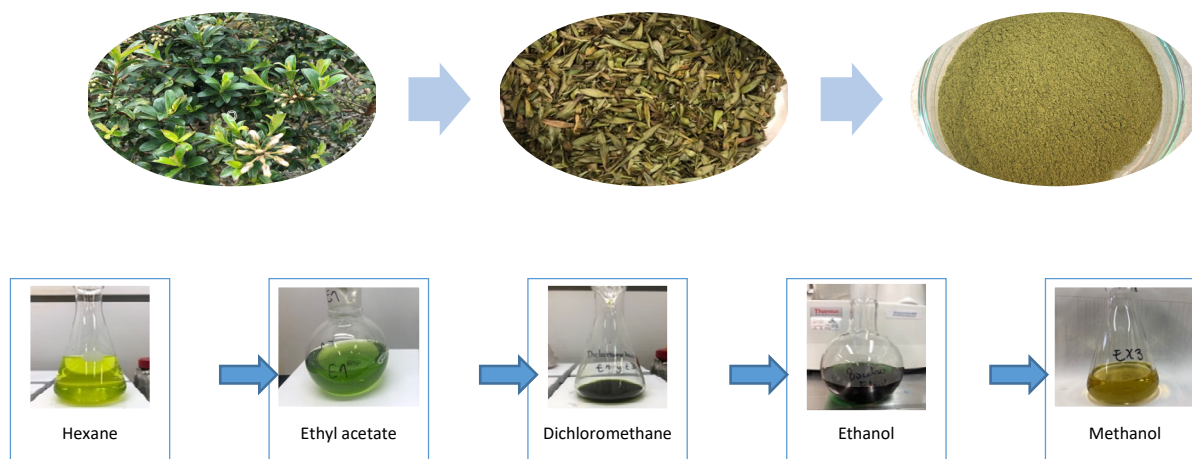

**Figure S2. Dry methanolic extract (DME) assay 3**

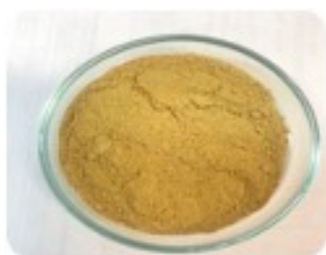

**Figure S3. Chromatographic profile of DME**

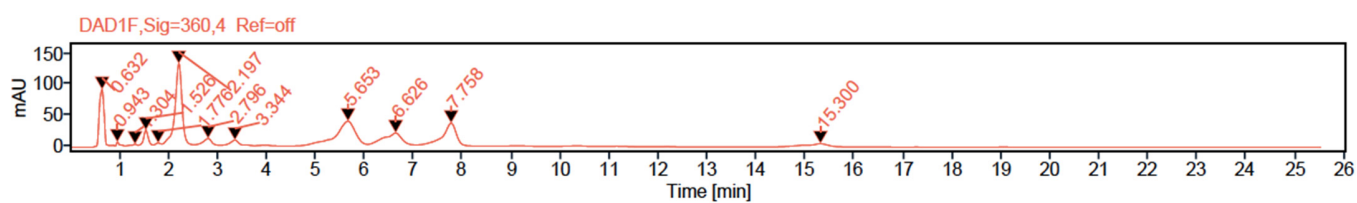

**Figure S4. UV spectrum of main DME components**

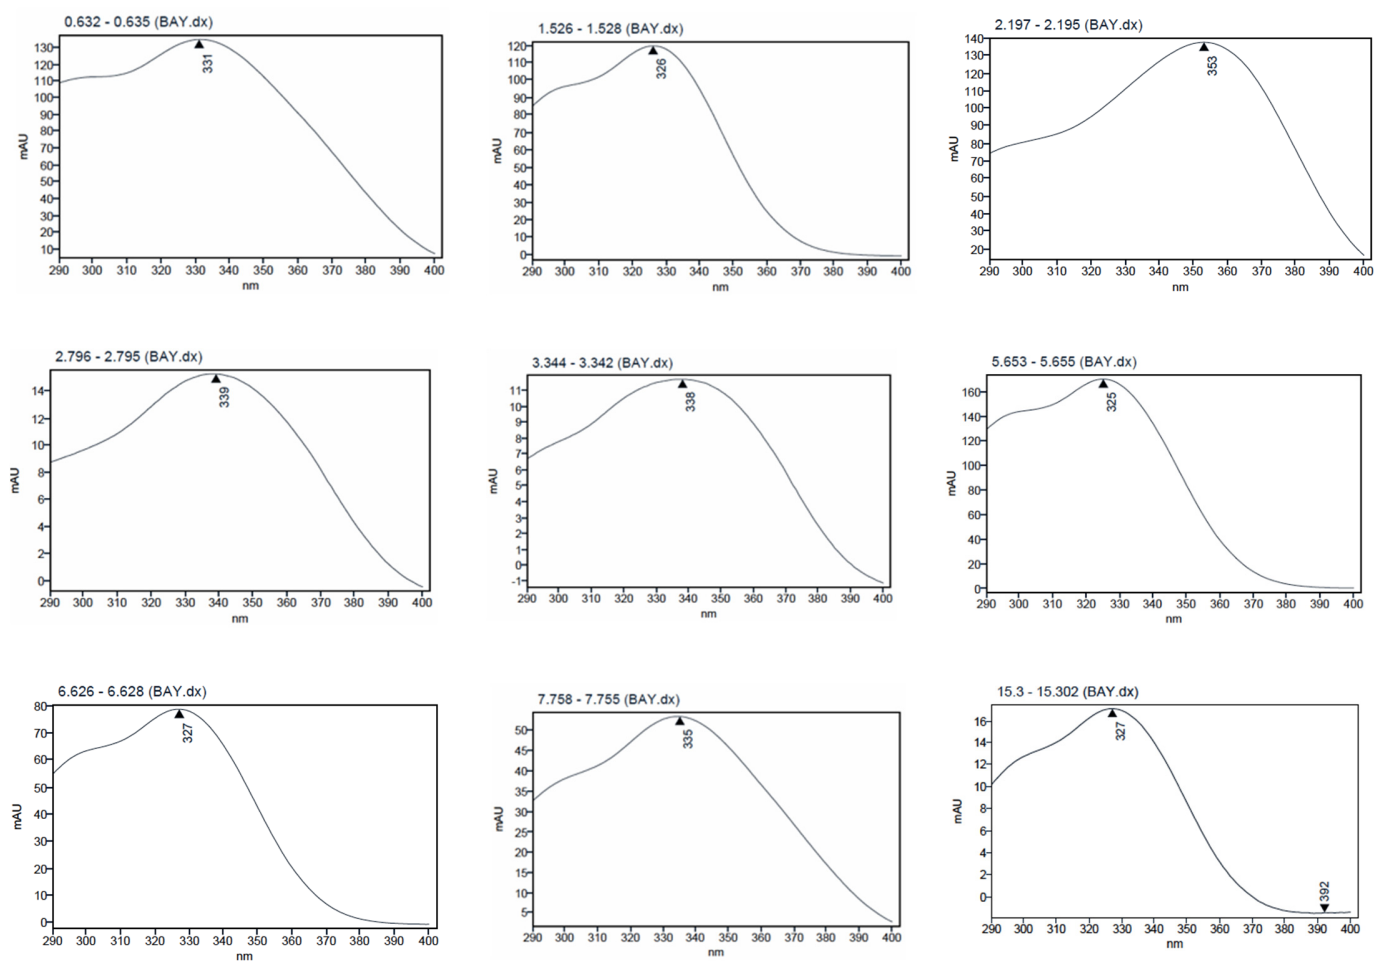

**Figure S5. Chromatographic profile of PME**

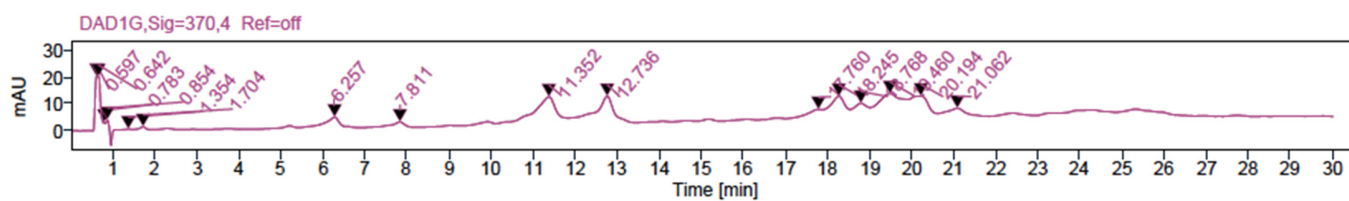

**Figure S6. UV spectrum of main PME components**

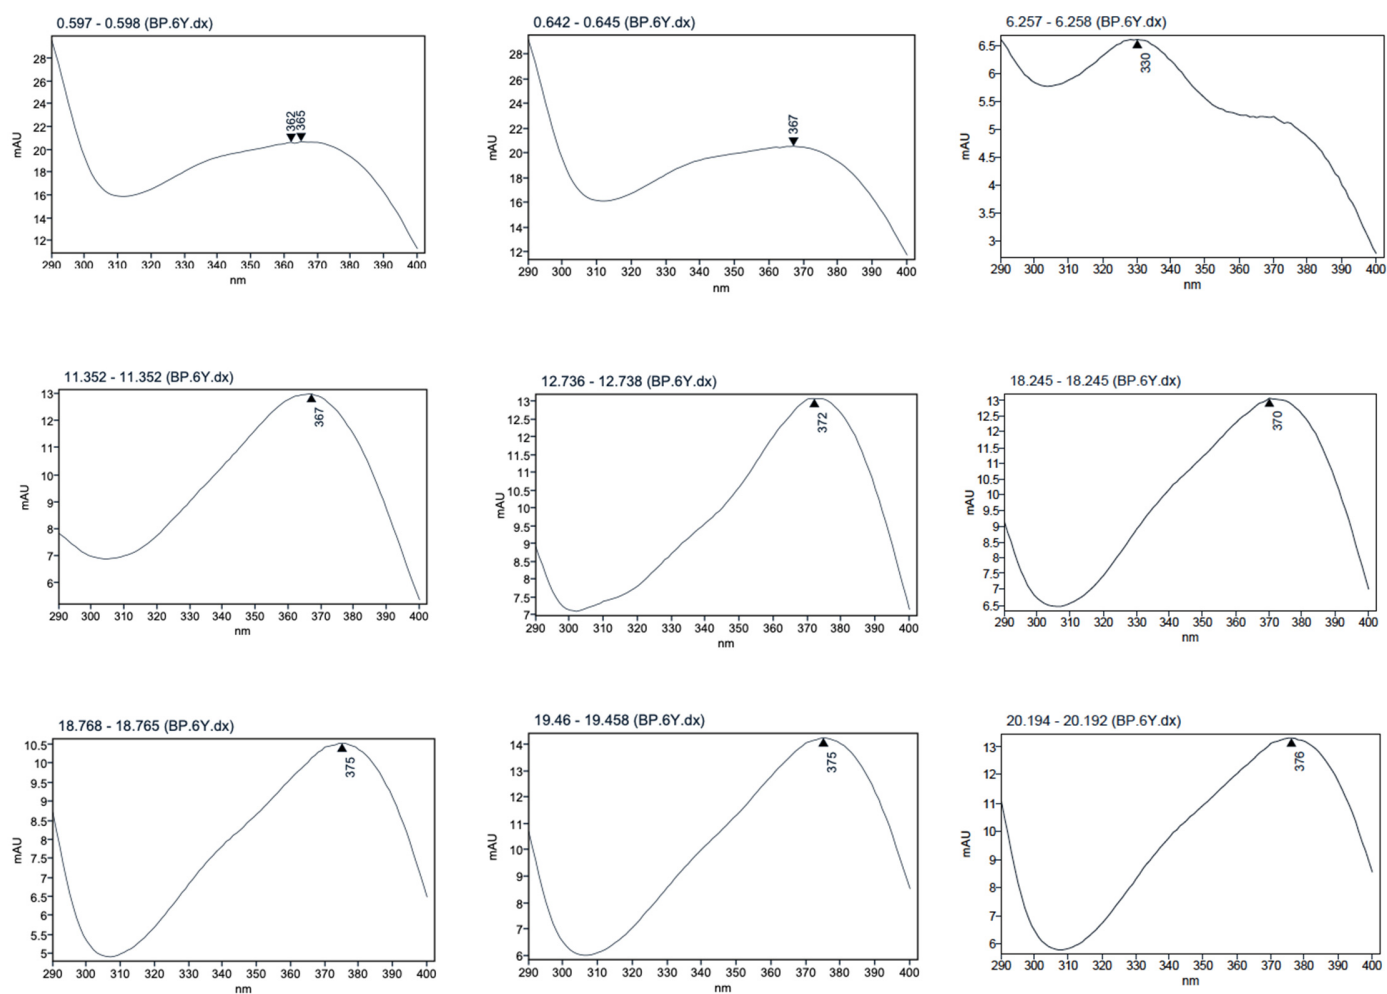

**Figure S7. Chromatograms and UV Spectra of Rutin and Quercetin**

Rutin

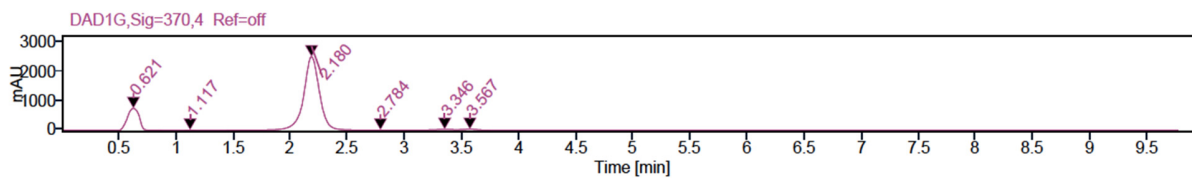

Quercetin

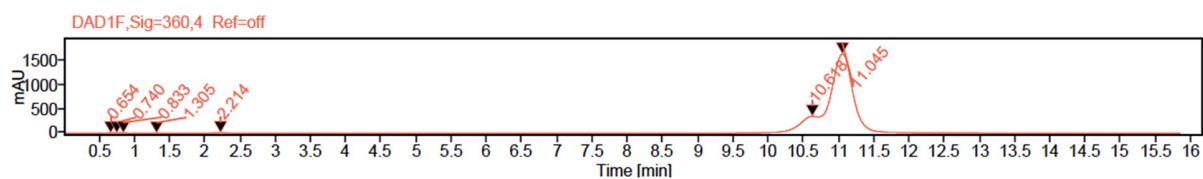

Rutin

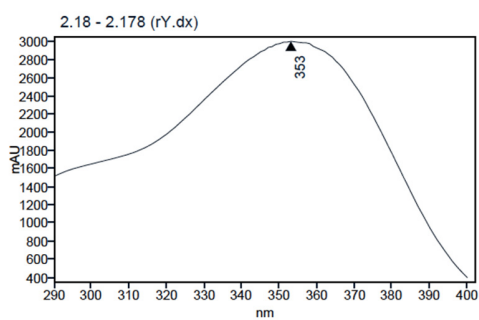

Quercetin

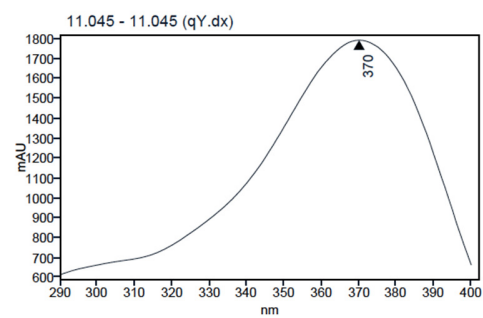

**Figure S8. ESI-MS/MS chromatogram for DME.**

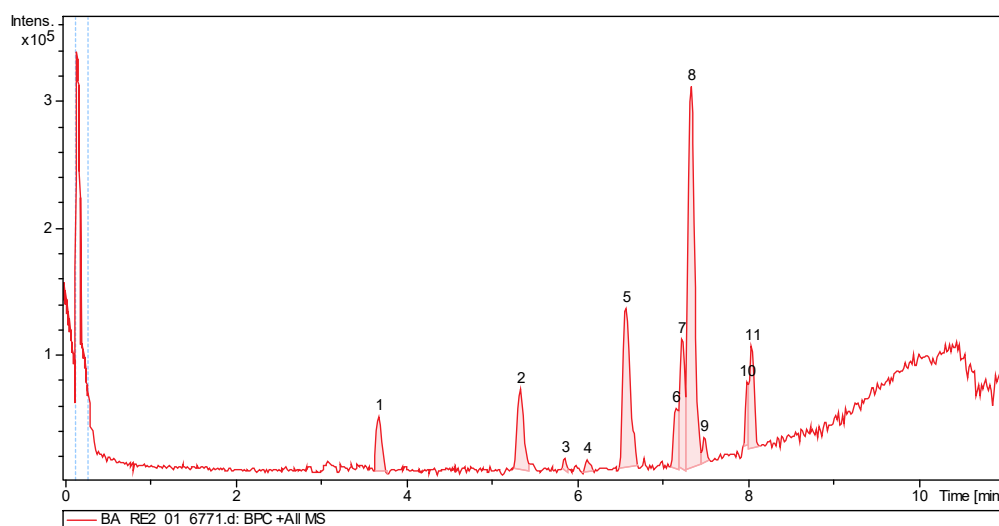

**Figure S9. ESI-MS/MS chromatogram for PME.**

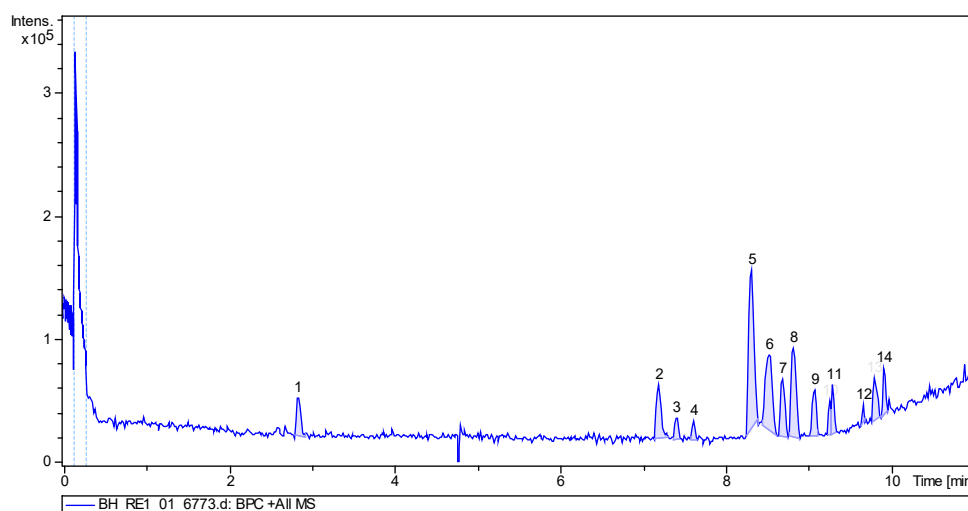

**Figure S10. Cell viability of HaCaT exposed to PME.**

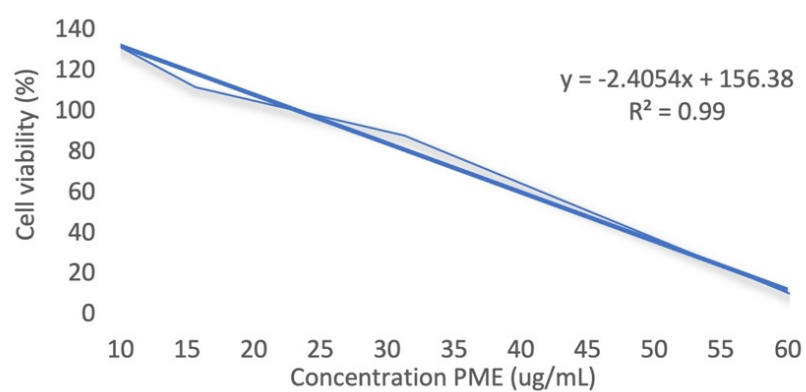

**Table S1. Spectral characteristics of the compounds identified in DME.**

| Peak | RT  | Spectrum                                        | ID                                                        |
|------|-----|-------------------------------------------------|-----------------------------------------------------------|
| 2    | 5.4 | <p>+MS, 5.3-5.5min #1965-2033, -Peak Bkgrnd</p> | 3-O-caffeoylquinic acid (chlorogenic acid)                |
| 5    | 6.6 | <p>+MS, 6.5-6.7min #2418-2501, -Peak Bkgrnd</p> | Caffeoylquinic acid hexose                                |
| 7    | 7.2 | <p>+MS, 7.2-7.3min #2677-2707, -Peak Bkgrnd</p> | Caffeoylquinic acid hexose                                |
| 8    | 7.3 | <p>+MS, 7.3-7.5min #2707-2774, -Peak Bkgrnd</p> | Quercetin 3-O-rhamnopyranosyl-(1→6)-glucopyranose (rutin) |
| 10   | 8.0 | <p>+MS, 8.0-8.0min #2960-2978, -Peak Bkgrnd</p> | Kaempferol 3-O-rhamnopyranosyl-(1→6)-glucopyranose        |

11 8.0

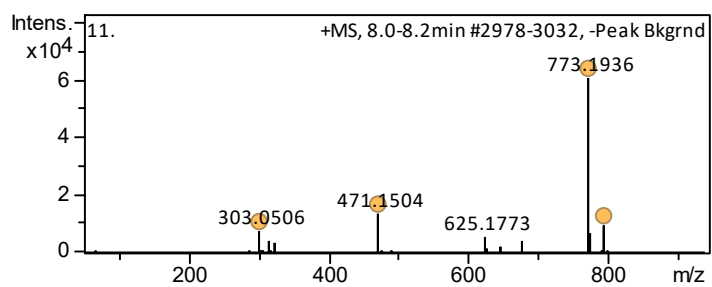

Quercetin-3-O-  
(4'''-O-caffeoyl)-  
rhamnopyranosyl-  
(1→6)-  
galactopyranose



**Table S2. Spectral characteristics of the compounds identified in PME.**

| Peak | RT  | Spectrum                                                                             | ID                    |
|------|-----|--------------------------------------------------------------------------------------|-----------------------|
| 1    | 2.8 | 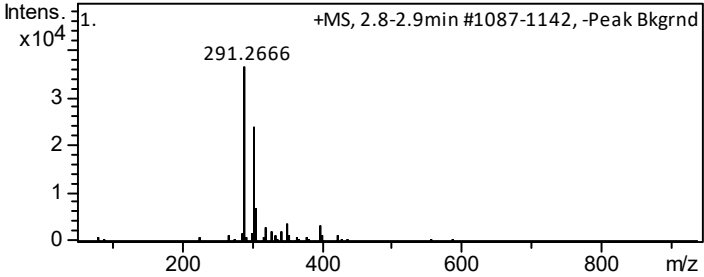   | epicatechin/catechin  |
| 10   | 9.3 |    | Quercetin-3-glucoside |
| 11   | 9.3 |  | Quercetin-3-glucoside |
| 12   | 9.7 |  | Kaempferol            |

**Table S3. Composition of the sunscreen emulsion.**

| Function                      | Compound                                                                                                    | Percentage in phase | Percent in emulsion |
|-------------------------------|-------------------------------------------------------------------------------------------------------------|---------------------|---------------------|
| <b>Phase A</b>                |                                                                                                             |                     |                     |
| <b>Surfactant emulsifying</b> | <b>Olivem 1000:</b> Cetearyl Olivatate (and) Sorbitan Olivatate                                             | 16.0                | 4.0                 |
|                               | <b>Protelan:</b> Glyceryl Stearate (and) Cetearyl Alcohol (and) Stearic Acid (and) Sodium Lauroyl Glutamate | 16.0                | 4.0                 |
| <b>Emulsion stabilizing</b>   | Stearic Acid                                                                                                | 4.0                 | 1.0                 |
| <b>Skin conditioning</b>      | Sesamum Indicum Seed Oil                                                                                    | 12.0                | 3.0                 |
|                               | Vitis vinifera seed oil                                                                                     | 8.0                 | 2.0                 |
|                               | Caprylic/Capric glycerides                                                                                  | 12.0                | 3.0                 |
|                               | Mangifera Indica Seed Butte                                                                                 | 8.0                 | 2.0                 |
|                               | Isopropyl myristate                                                                                         | 8.0                 | 2.0                 |
|                               | Cetyl alcohol                                                                                               | 4.0                 | 1.0                 |
|                               | Cetyl palmitate                                                                                             | 8.0                 | 2.0                 |
| <b>Antioxidant</b>            | Tocopherol                                                                                                  | 4.0                 | 1.0                 |
| <b>Total in phase A</b>       |                                                                                                             | 100.0               | 25.0                |
| <b>Phase B</b>                |                                                                                                             |                     |                     |
|                               | Water                                                                                                       | 94.9                | 56.2                |
| <b>Humectant</b>              | Sorbitol 60 %                                                                                               | 5.1                 | 3.0                 |
| <b>Total in phase B</b>       |                                                                                                             | 100.0               | 59.2                |
| <b>Phase C</b>                |                                                                                                             |                     |                     |
| <b>Active</b>                 | Extract                                                                                                     | 66.7                | 10.0                |
| <b>Solvent</b>                | Propylene glycol                                                                                            | 33.3                | 5.0                 |
| <b>Total in phase C</b>       |                                                                                                             | 100.0               | 15.0                |
| <b>Phase D</b>                |                                                                                                             |                     |                     |
| <b>Preservative</b>           | <b>Geogard 221:</b> Dehydroacetic Acid (and) Benzyl Alcohol                                                 | 100.0               | 0.8                 |
| <b>Total in phase D</b>       |                                                                                                             | 100.0               | 0.8                 |
| <b>TOTAL</b>                  |                                                                                                             |                     | <b>100.0</b>        |
